# Supplementary material for: Molecular Evolution of RAMOSA1 (RA1) in Land Plants
Source: MDPI journal article supplement (doi:10.3390/biom14050550), 2024-05-03
Supplement: s1 [file s1]

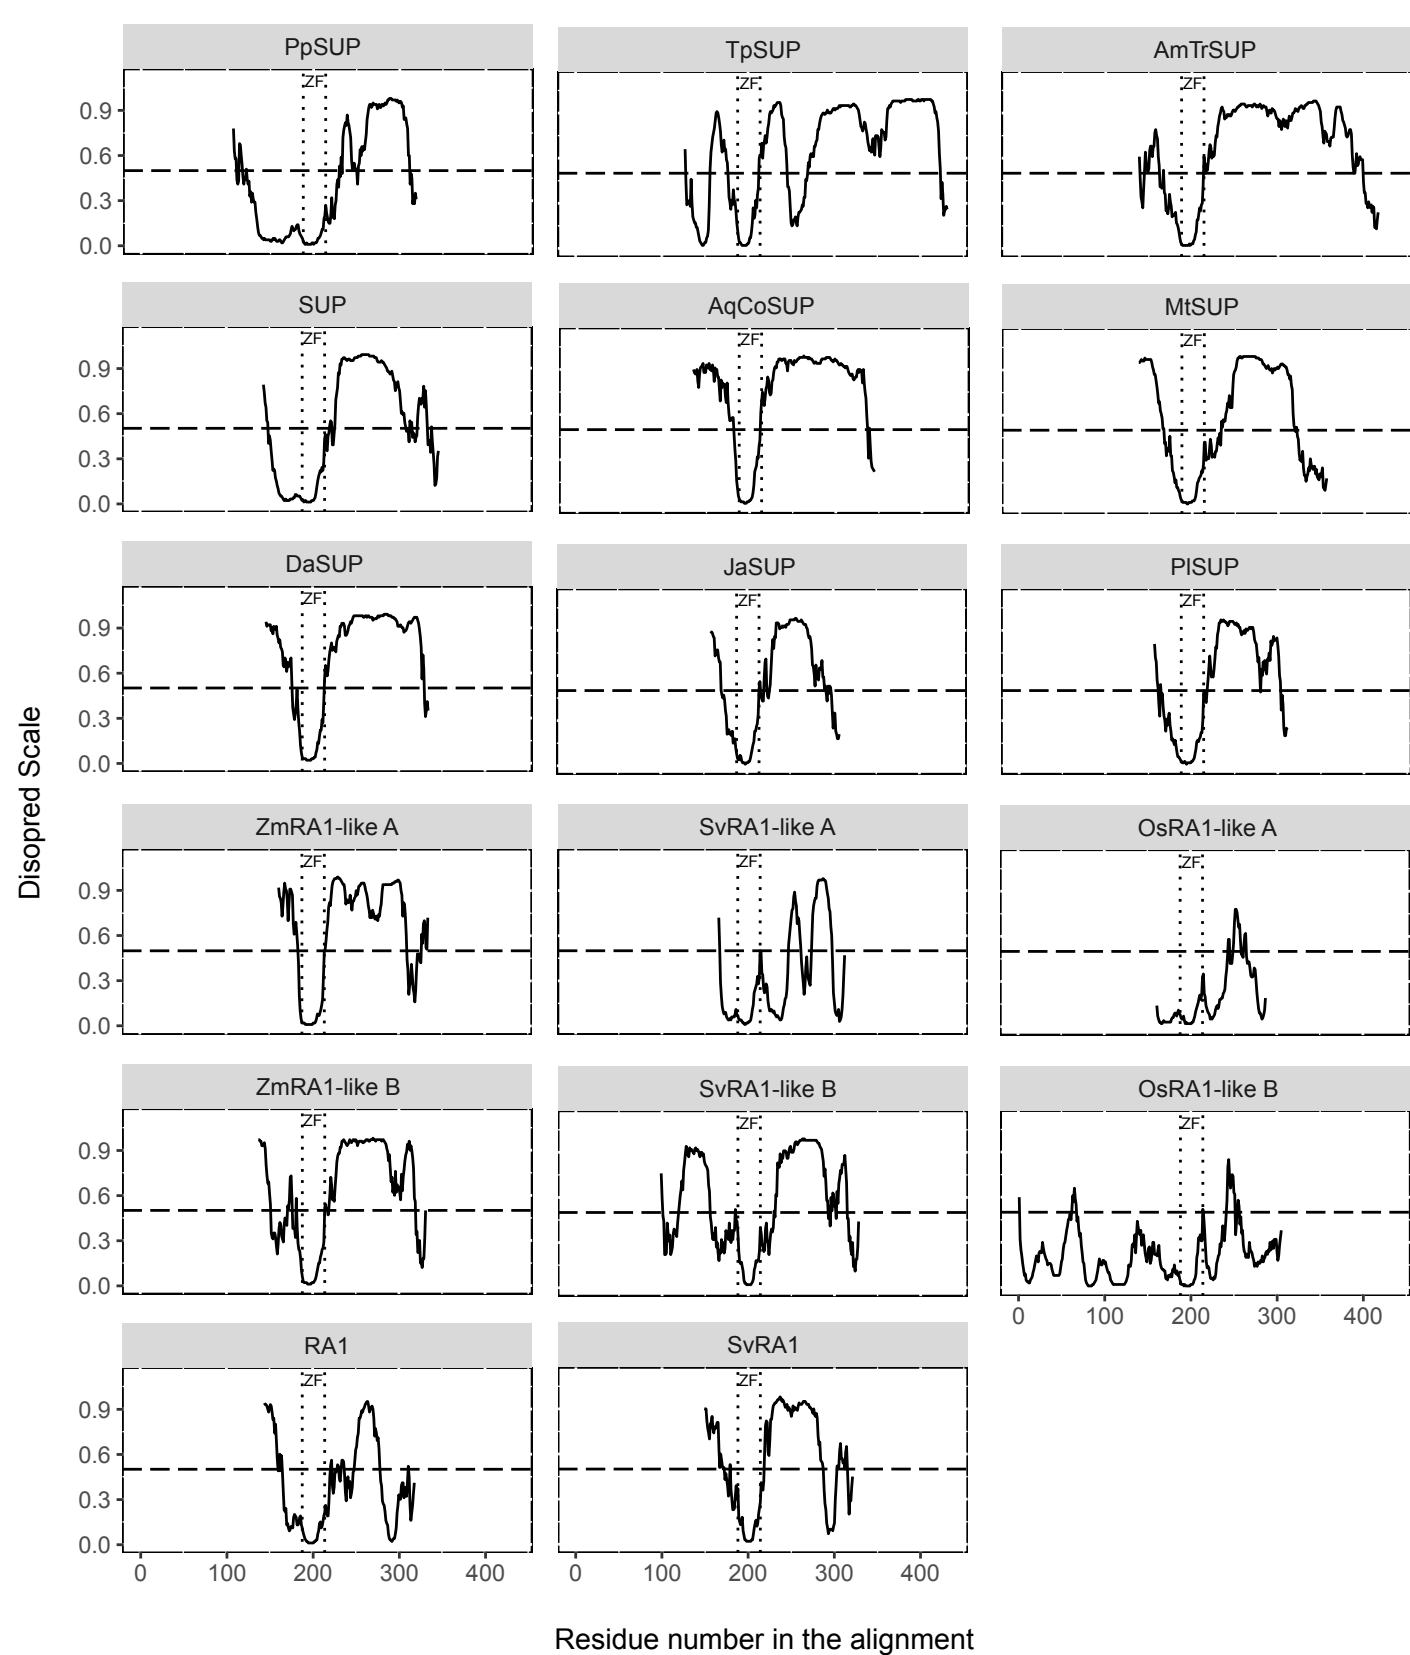

**Figure S10.** Proteins conformational plasticity. Relative disorder levels of the structures are measured in a range of 0 to 1.0, following the algorithms used by DisoPred 3.1 server. Levels above 0.5 (dashed line) indicate disordered regions. The segment corresponding to the zinc finger (ZF) domain is marked in the figure.
