# Supplementary material for: Molecular Evolution of RAMOSA1 (RA1) in Land Plants
Source: MDPI journal article supplement (doi:10.3390/biom14050550), 2024-05-03
Supplement: s1 [file s1]

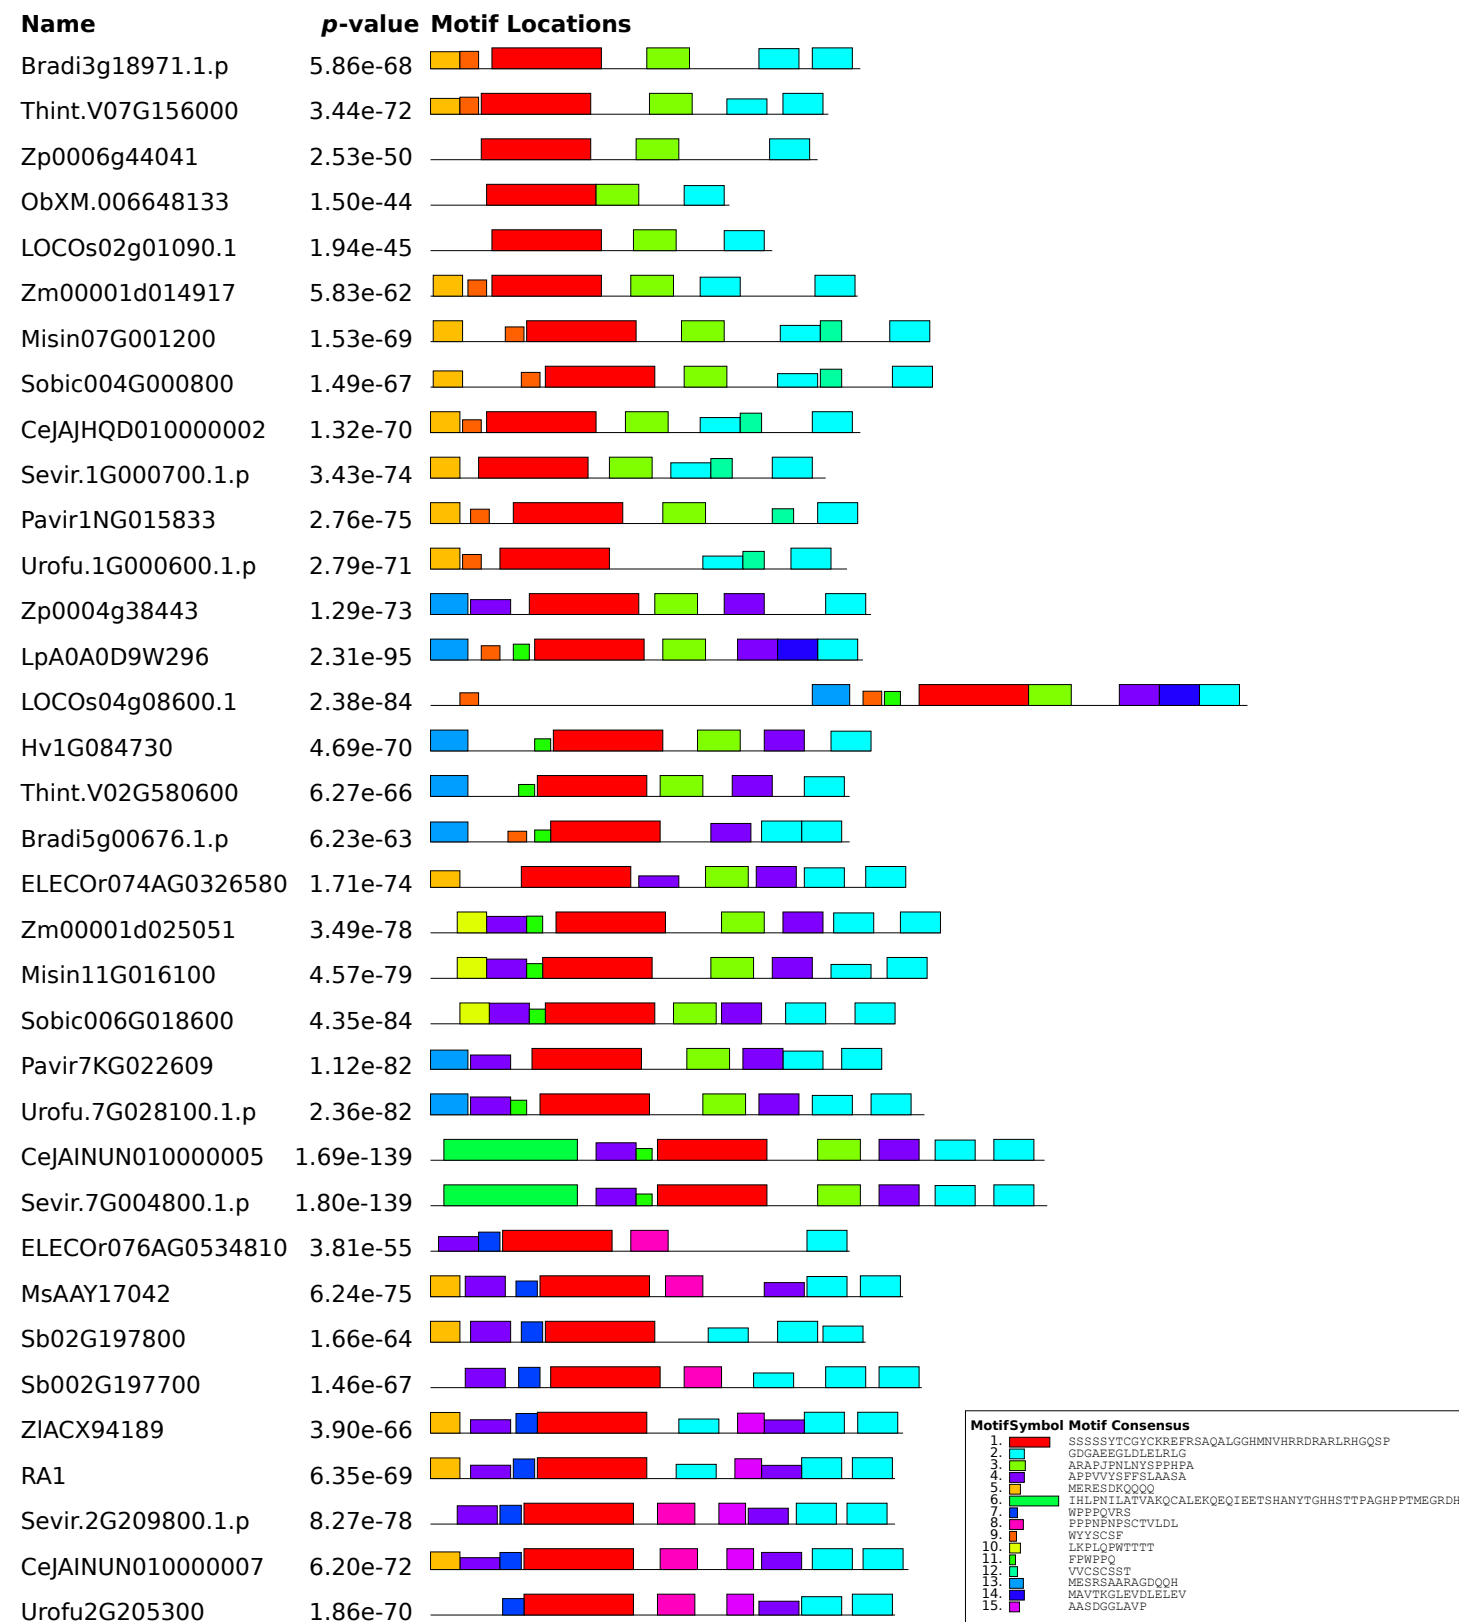

**Figure S7.** Schematic distribution of conserved motifs in RA1 and RA1-like proteins identified by MEME. The fifteen motifs are represented in different colors. Motif 1 represents the conserved zinc finger domain. Motif 2 represents the conserved putative EAR domain.
