# Supplementary material for: Molecular Evolution of RAMOSA1 (RA1) in Land Plants
Source: MDPI journal article supplement (doi:10.3390/biom14050550), 2024-05-03
Supplement: s1 [file s1]

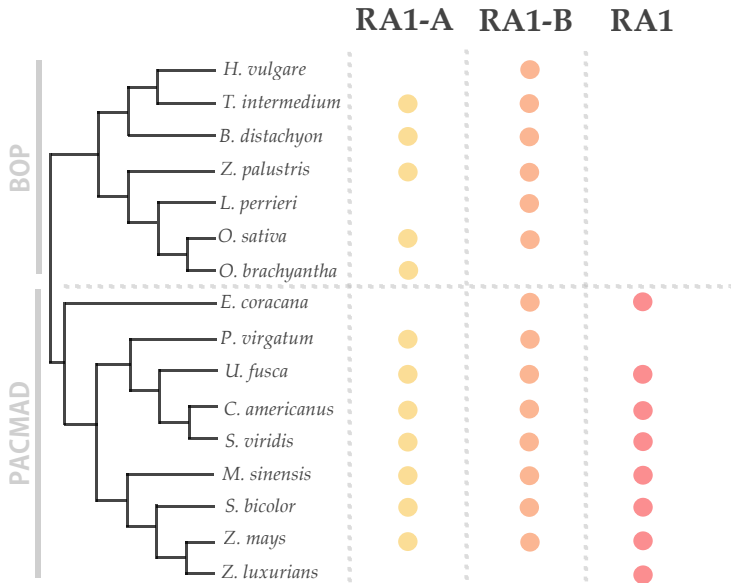

**Figure S4.** Scheme representing the presence or absence of RA1 and RA1-like proteins in grass species. Colored circle represents the presence of the protein.
