# Supplementary material for: Molecular Evolution of RAMOSA1 (RA1) in Land Plants
Source: MDPI journal article supplement (doi:10.3390/biom14050550), 2024-05-03
Supplement: s1 [file s1]

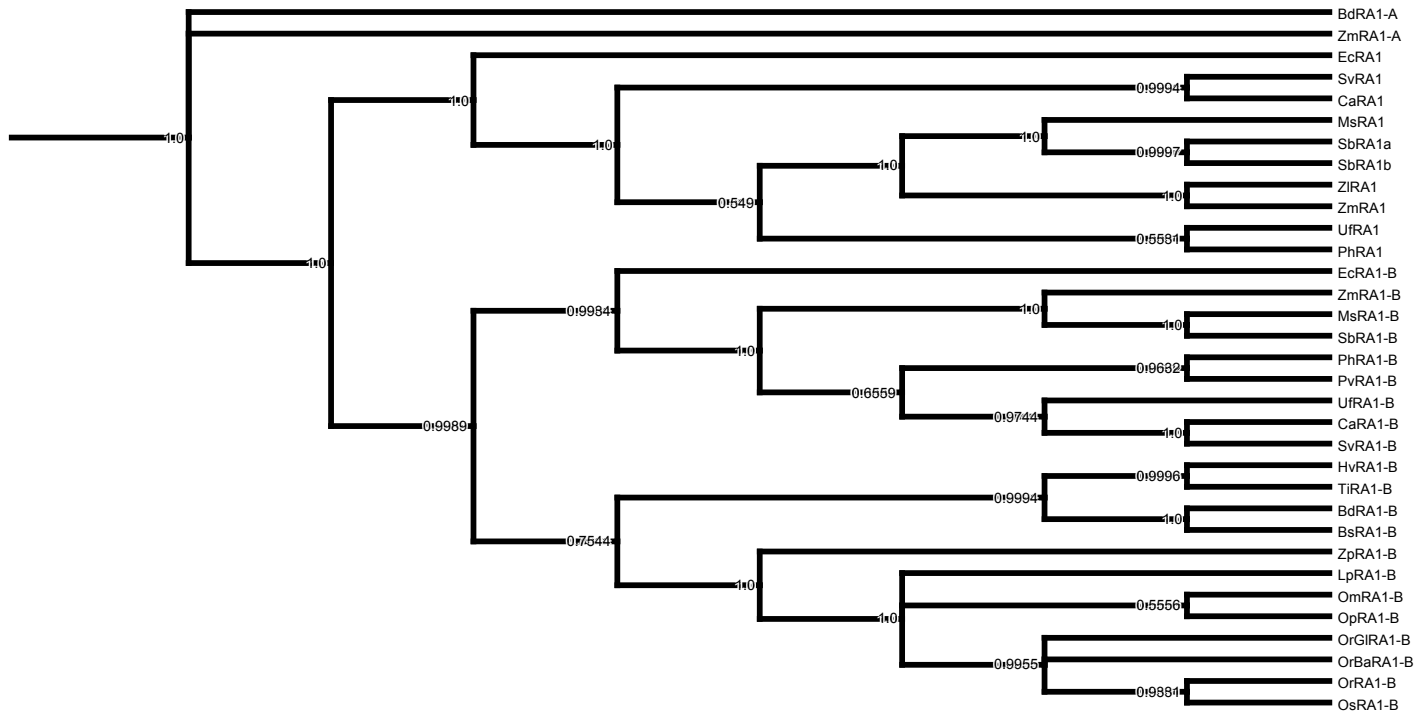

**Figure S3.** Resolved phylogenetic tree between RA1 and RA1-like B. Majority rule consensus tree (N=22502 trees) of RA1 and RA1-like B TFs in grasses generated by Bayesian inference using 33 amino acid sequences. BdRA1-A and ZmRA1-A were used as outgroups.
