# Supplementary material for: Molecular Evolution of RAMOSA1 (RA1) in Land Plants
Source: MDPI journal article supplement (doi:10.3390/biom14050550), 2024-05-03
Supplement: s1 [file s1]

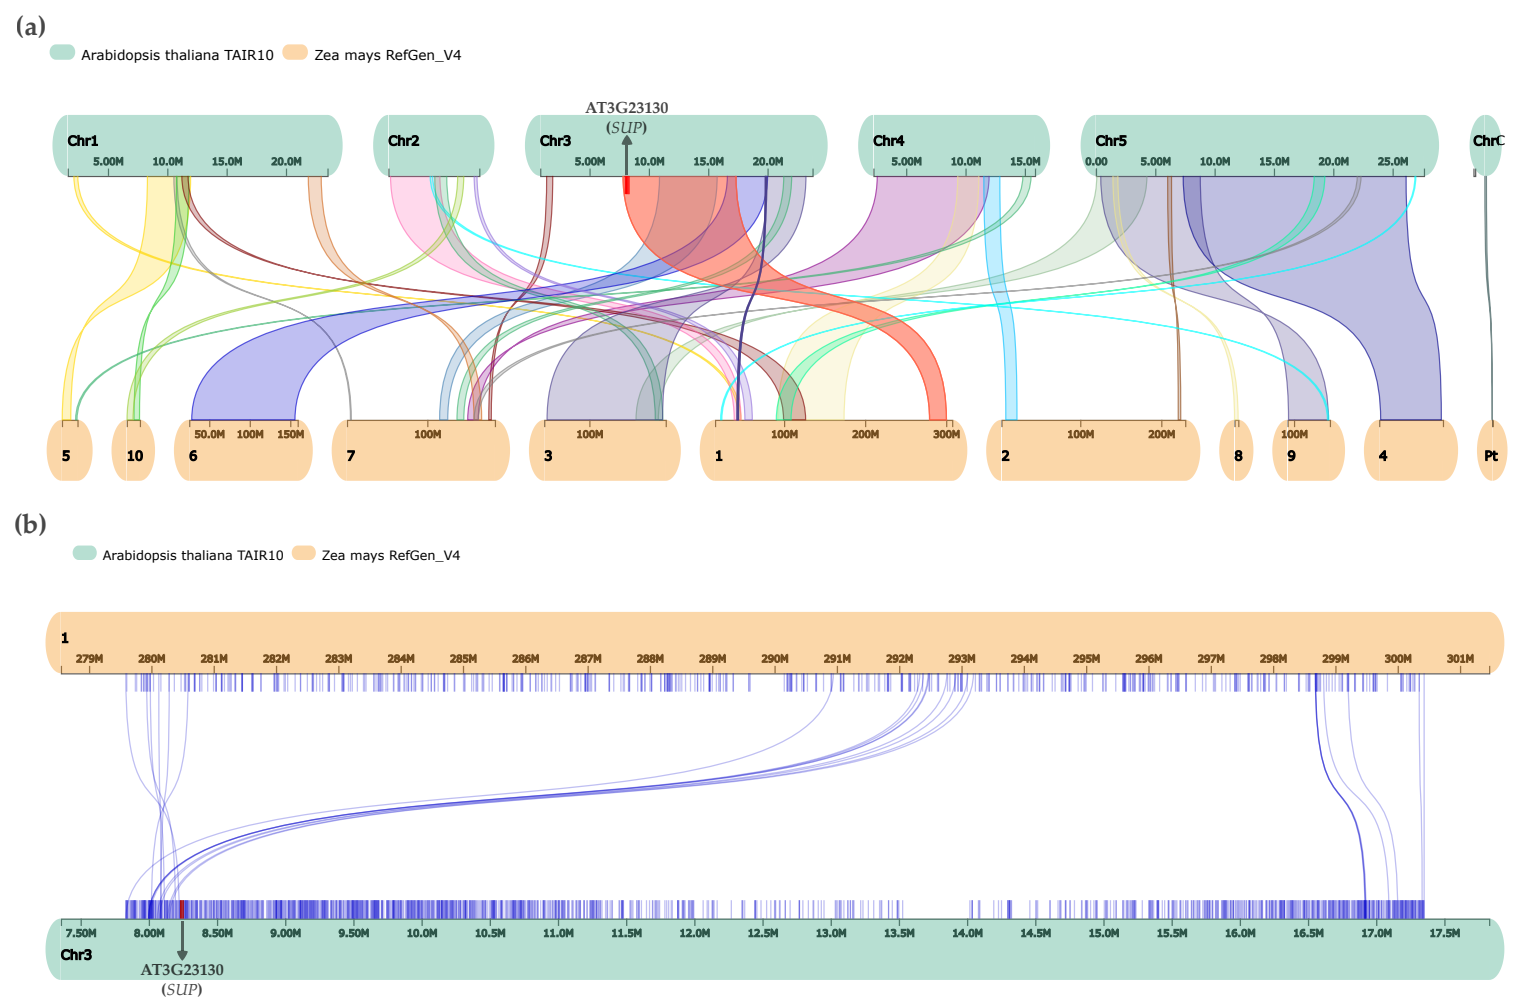

**Figure S5.** Chromosome synteny between *A. thaliana* and *Z. mays*. (a) Analysis of synteny between genomes. Colored lines link collinearity blocks that represent syntenic regions identified by GENESPACE. (b) Zoom in of gene collinearity between chromosome 3 of *A. thaliana* and chromosome 1 of *Z. mays*.
