# Supplementary material for: Molecular Evolution of RAMOSA1 (RA1) in Land Plants
Source: MDPI journal article supplement (doi:10.3390/biom14050550), 2024-05-03
Supplement: s1 [file s1]

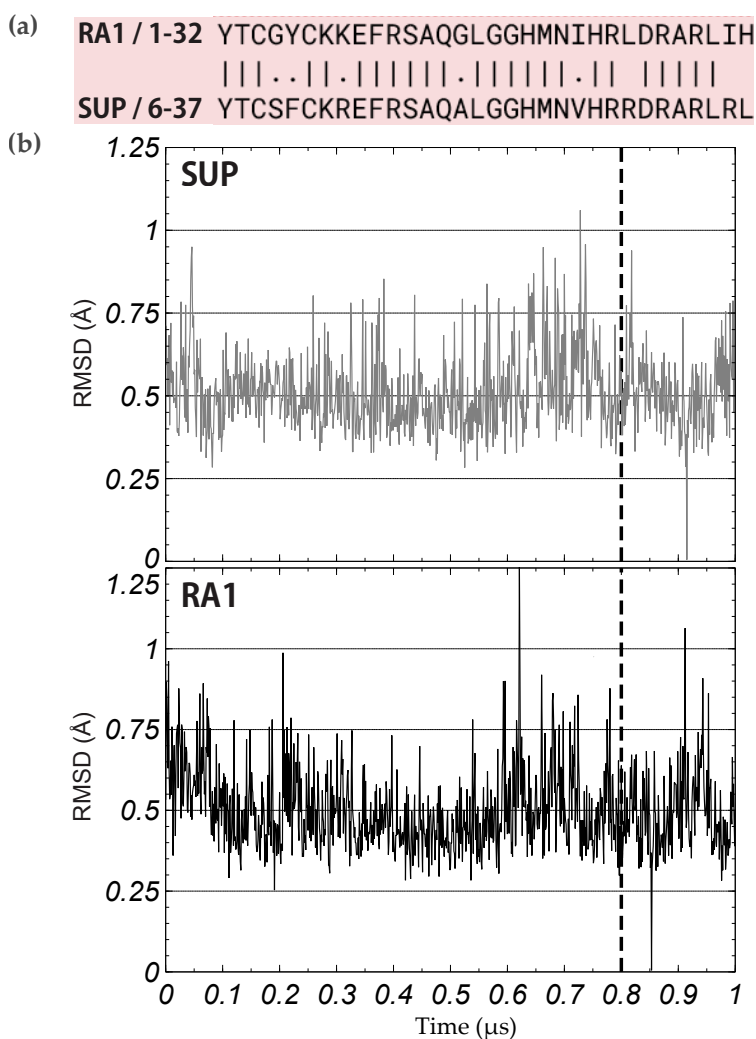

**Figure S11.** Zinc finger dynamic simulation. (a) Local sequence alignment of RA1 and SUP zinc finger domain as determined by Smith-Waterman algorithm (residue identity 75%). (b) Time evolution of the RMSD of the backbone atoms of the RA1 (above) and SUP (below) peptides in the simulated interval 0.0 to 1.0  $\mu\text{s}$ . The structure with the smallest RMSD in the interval 0.0 to 1.0  $\mu\text{s}$  of each simulation has been used as reference for fitting the structures of each peptide. The vertical gray dashed line at 0.8  $\mu\text{s}$  marks the time that has been assumed as the beginning of the thermodynamic equilibrium interval for properties calculations.
