# Supplementary material for: Molecular Evolution of RAMOSA1 (RA1) in Land Plants
Source: MDPI journal article supplement (doi:10.3390/biom14050550), 2024-05-03
Supplement: s1 [file s1]

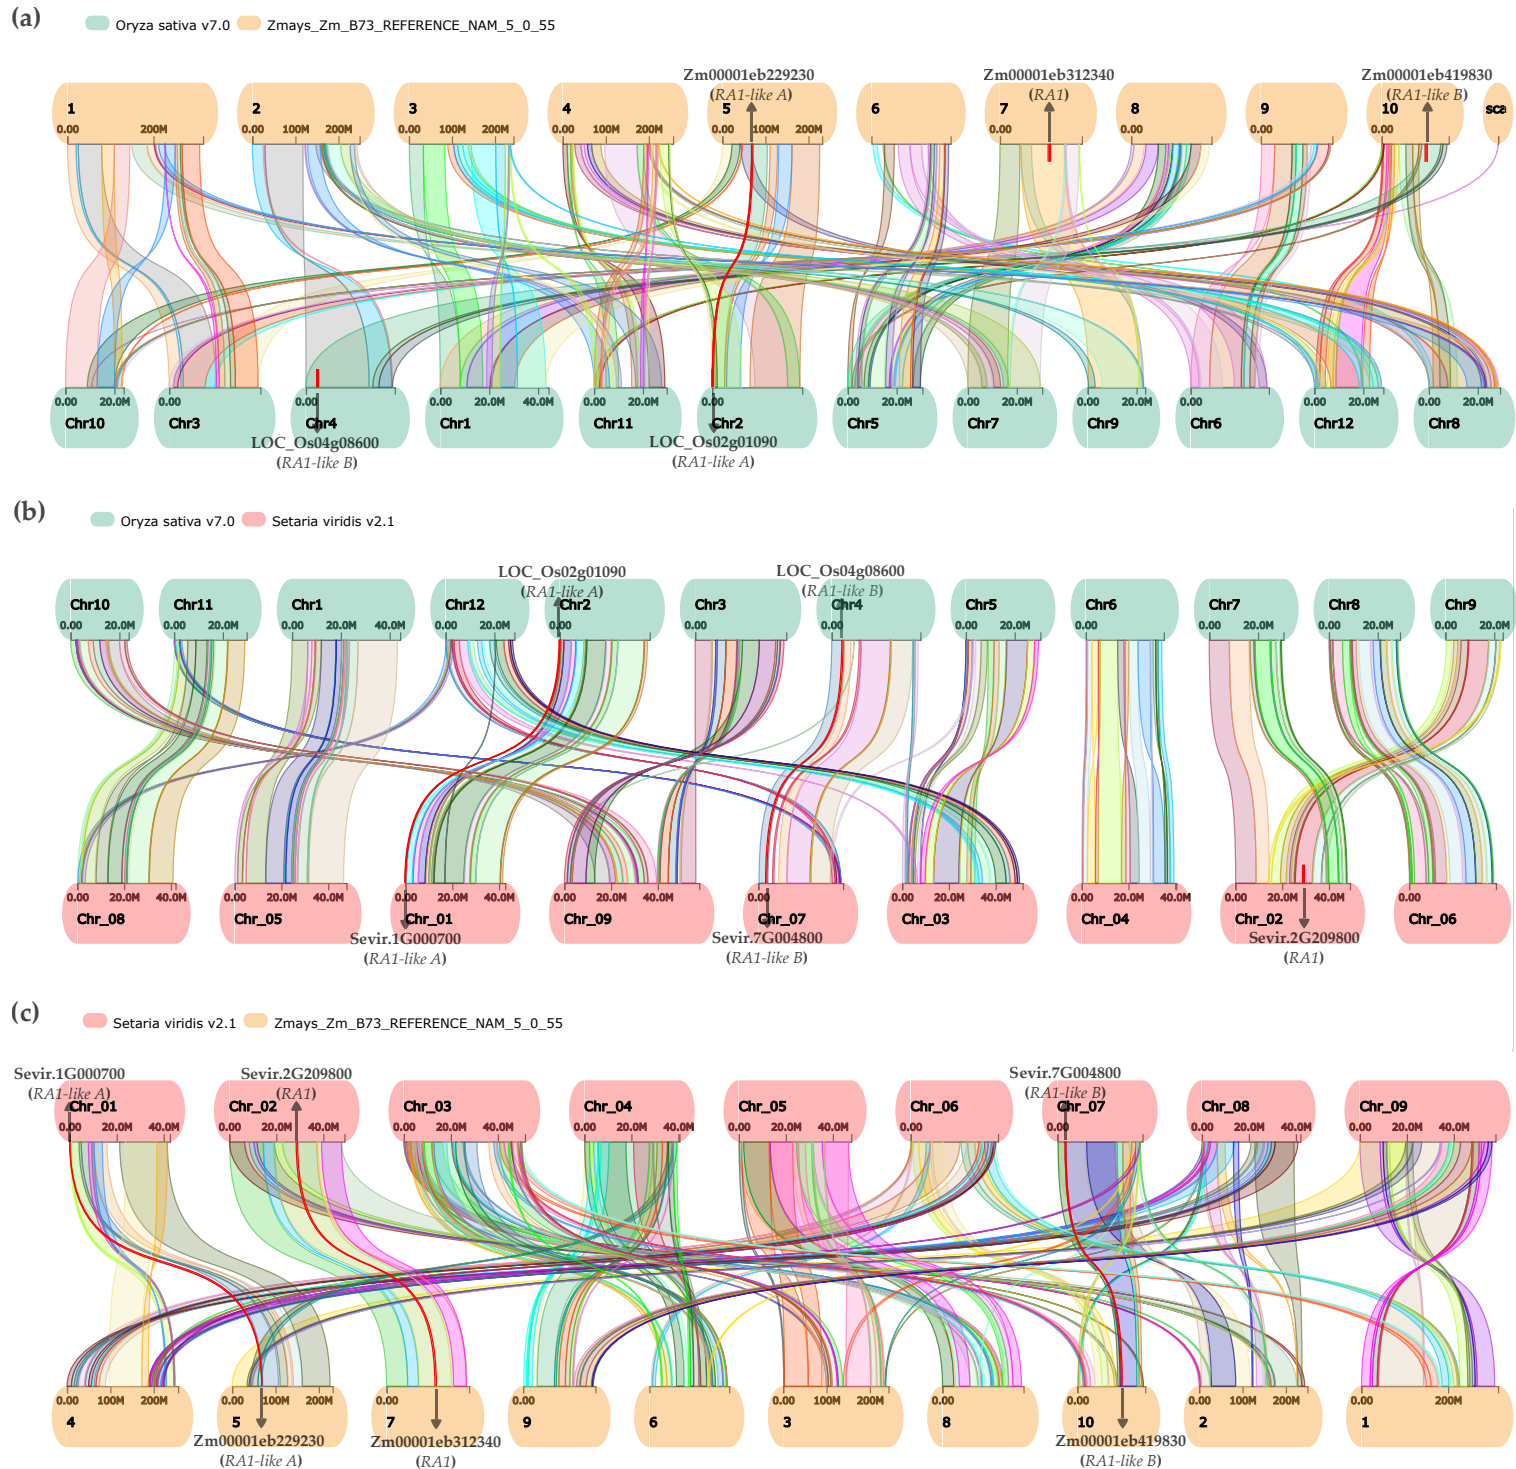

**Figure S6.** Chromosome synteny between *O. sativa*, *Z. mays*, and *S. viridis*. (a) Analysis of synteny between *O. sativa* and *Z. mays* genomes. Colored lines link collinearity blocks that represent syntenic regions identified by GENESPACE. (b) Analysis of synteny between *O. sativa* and *S. viridis* genomes. Colored lines link collinearity blocks that represent syntenic regions identified by GENESPACE. (c) Analysis of synteny between *S. viridis* and *Z. mays* genomes. Colored lines link collinearity blocks that represent syntenic regions identified by GENESPACE.
