# Supplementary material for: Molecular Evolution of RAMOSA1 (RA1) in Land Plants
Source: Biomolecules. 2024 May 3;14(5):550. doi: 10.3390/biom14050550 (PMC11117814; doi:10.3390/biom14050550)
Supplement: Supplementary file 1 [file biomolecules-14-00550-s001.zip]

Archive with 17 entries (17 files):
- Supplementary Materials V2/Figure S1.pdf
- Supplementary Materials V2/Figure S10.pdf
- Supplementary Materials V2/Figure S11.pdf
- Supplementary Materials V2/Figure S2.pdf
- Supplementary Materials V2/Figure S3.pdf
- Supplementary Materials V2/Figure S4.pdf
- Supplementary Materials V2/Figure S5.pdf
- Supplementary Materials V2/Figure S6.pdf
- Supplementary Materials V2/Figure S7.pdf
- Supplementary Materials V2/Figure S8.pdf
- Supplementary Materials V2/Figure S9.pdf
- Supplementary Materials V2/Table S1.xlsx
- Supplementary Materials V2/Table S2.xlsx
- Supplementary Materials V2/Table S3.xlsx
- Supplementary Materials V2/Table S4.xlsx
- Supplementary Materials V2/Table S5.xlsx
- Supplementary Materials V2/Table S6.xlsx
