# Supplementary material for: Molecular Evolution of RAMOSA1 (RA1) in Land Plants
Source: Biomolecules. 2024 May 3;14(5):550. doi: 10.3390/biom14050550 (PMC11117814; doi:10.3390/biom14050550)
Supplement: Supplementary file 1 [file biomolecules-14-00550-s001.zip › Supplementary Materials V2/Table S3.xlsx]

## Sheet: Sheet 1
Functional characterized proteins information
Name	Description	Functional information
AmTrSUP	zinc finger protein 10-like	-
AcSUP	C2H2-like zinc finger protein	-
AqCoSUP	C2H2-like zinc finger protein	-
SUP	transcriptional regulator characterized: SUPERMAN	[1]
BsRA1-B	C2H2-like zinc finger protein	-
BrStRA1-A	C2H2-like zinc finger protein	-
BdRA1-A	C2H2-like zinc finger protein	-
BdRA1-B	C2H2-like zinc finger protein	-
BrSUP	C2H2-like zinc finger protein	-
CpSUP	CpSUPL (superman-like)	-
CrSUP	C2H2-like zinc finger protein	-
CaRA1	C2H2-like zinc finger protein	-
CaRA1-A	C2H2-like zinc finger protein	-
CaRA1-B	C2H2-like zinc finger protein	-
CePuSUP	C2H2-like zinc finger protein	-
CcSUP	C2H2-like zinc finger protein	-
DaSUP	C2H2-like zinc finger protein	-
EcRA1	C2H2-like zinc finger protein	-
EcRA1-B	C2H2-like zinc finger protein	-
HvRA1-B	C2H2-like zinc finger protein	-
JaSUP	C2H2-like zinc finger protein	-
LpRA1-B	C2H2-like zinc finger protein	-
MtSUP	transcriptional regulator characterized: MtSUPERMAN	[2]
MsRA1	RAMOSA1	-
MsRA1-A	C2H2-like zinc finger protein	-
MsRA1-B	C2H2-like zinc finger protein	-
OeSUP	transcriptional regulator SUPERMAN-like	-
OrBaRA1-A	C2H2-like zinc finger protein	-
OrBaRA1-B	C2H2-like zinc finger protein	-
ObRA1-A	transcriptional regulator SUPERMAN-like	-
OgRA1-A	C2H2-like zinc finger protein	-
OrGlRA1-A	C2H2-like zinc finger protein	-
OrGlRA1-B	C2H2-like zinc finger protein	-
OmRA1-A	NAC domain-containing protein	-
OmRA1-B	C2H2-like zinc finger protein	-
OnRA1-A	C2H2-like zinc finger protein	-
OpRA1-A	NAC domain-containing protein	-
OpRA1-B	C2H2-like zinc finger protein	-
OrRA1-A	C2H2-like zinc finger protein	-
OrRA1-B	C2H2-like zinc finger protein	-
OsRA1-A	ZOS2-01 ( C2H2 Zinc-finger protein TFIIIA type of Oryza sativa)	-
OsRA1-B	SRO (Small Reproductive Organs)	[3]
PhRA1	C2H2-like zinc finger protein (PhRA1)	-
PhRA1-A	C2H2-like zinc finger protein	-
PhRA1-B	transcriptional regulator SUPERMAN-like	-
PvRA1-A	transcriptional regulator SUPERMAN-like	-
PvRA1-B	zinc finger protein 11-like	-
PlSUP	C2H2-like zinc finger protein	-
PpSUP	transcriptional regulator TAC1-like	-
PtSUP	transcriptional regulator SUPERMAN	-
PrPeSUP	transcriptional regulator SUPERMAN	-
RcSUP	transcriptional regulator SUPERMAN	-
SvRA1	transcriptional regulator SUPERMAN-like	-
SvRA1-A	transcriptional regulator SUPERMAN-like	-
SvRA1-B	C2H2-like zinc finger protein	-
SbRA1a	RAMOSA1 C2H2 zinc-finger transcription factor-like (SbRA1US)	-
SbRA1b	C2H2-like zinc finger protein (SbRA1DS)	-
SbRA1-A	C2H2-like zinc finger protein	-
SbRA1-B	C2H2-like zinc finger protein	-
StSUP	transcriptional regulator SUPERMAN-like	-
TcSUP	C2H2-like zinc finger protein	-
TiRA1-A	C2H2-like zinc finger protein	-
TiRA1-B	C2H2-like zinc finger protein	-
TpSUP	transcriptional regulator SUPERMAN	-
UfRA1	C2H2-like zinc finger protein	-
UfRA1-A	C2H2-like zinc finger protein	-
UfRA1-B	C2H2-like zinc finger protein	-
VdSUP	C2H2-like zinc finger protein	-
ZlRA1	RAMOSA1 C2H2 zinc-finger transcription factor	-
RA1	transcriptional regulator characterized: RAMOSA1	[4]
ZmRA1-A	transcriptional regulator SUPERMAN	-
ZmRA1-B	C2H2-like zinc finger protein	-
ZpRA1-A	C2H2-like zinc finger protein	-
ZpRA1-B	C2H2-like zinc finger protein	-
[1] Bowman, J.L.; Sakai, H.; Jack, T.; Weigel, D.; Mayer, U.; Meyerowitz, E.M. SUPERMAN, a regulator of floral homeotic genes in Arabidopsis. Development 1992, 114(3), 599-615.
[2] Rodas, A.L.; Roque, E.; Hamza, R.; Gómez-Mena, C.; Minguet, E.G.; Wen, J.; Mysore, K.S.; Beltrán, J.P.; Cañas, L.A. MtSUPERMAN plays a key role in compound inflorescence and flower development in Medicago truncatula. Plant Journal 2021, 105, 816-830
[3] Xu, W.; Zhu, W.; Yang, L.; Liang, W.; Li, H.; Yang, L.; Chen, M.; Luo, Z.; Huang, G.; Duan, L.; Dreni, L.; Zhang, D. SMALL REPRODUCTIVE ORGANS, a SUPERMAN-like transcription factor, regulates stamen and pistil growth in rice. New Phytologist 2022, 233, 1701-1718.
[4] Vollbrecht, E.; Springer, P.; Goh, L.; Buckler, E.S.; Martienssen R. Architecture of floral branch systems in maize and related grasses. Nature 2005, 436, 1119–1126. https://doi.org/10.1038/nature03892.
