# Supplementary figures and images for: Molecular Evolution of RAMOSA1 (RA1) in Land Plants
Source: MDPI journal article supplement (doi:10.3390/biom14050550), 2024-05-03

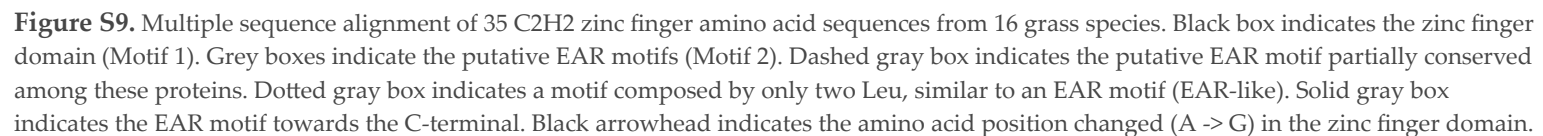

Supplement: s1 [file s1]

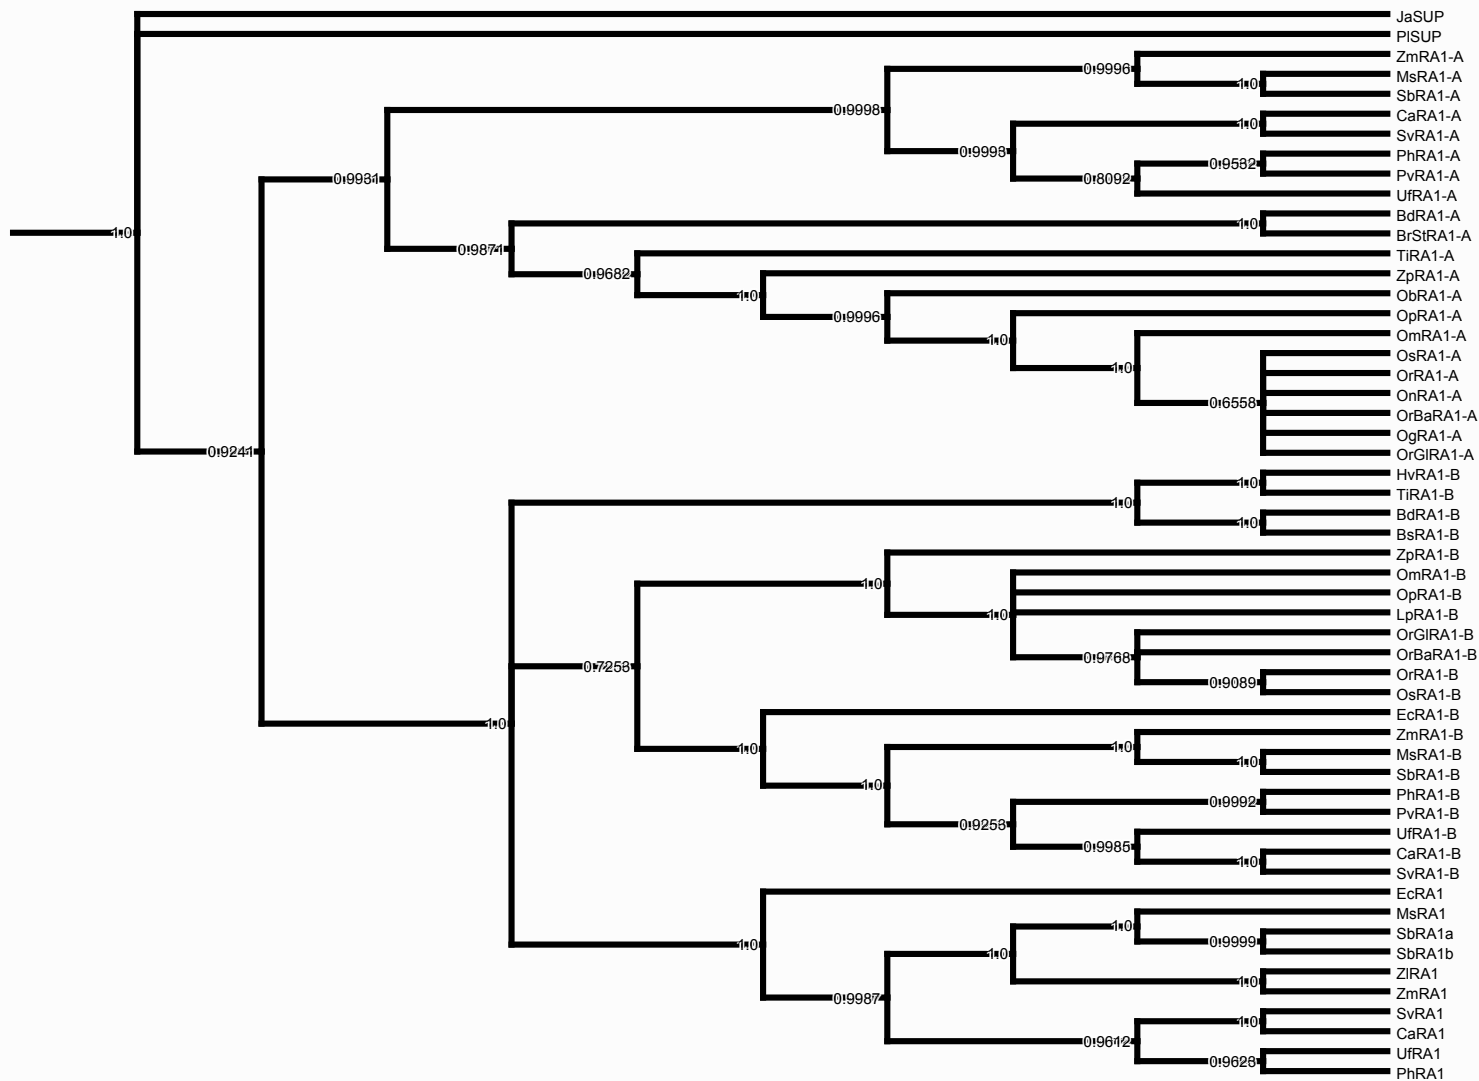

Supplement: s1 [file s1]
